# Supplementary material
Source: PubMed Central journal article supplement (PMC4604402)
Supplement: AAC.00792-15_zac011154508so1.pdf [file AAC.00792-15_zac011154508so1.pdf]

**Supplementary Data for “A Phospholipase A1 modulates cell envelope phospholipid content of *Brucella melitensis*, contributing to polymyxin resistance and pathogenicity”**

Tobias Kerrinnes, Briana M. Young, Carlos Leon, Christelle M. Roux, Lisa Tran, Vidya L. Atluri, Maria G. Winter and Renée M. Tsolis

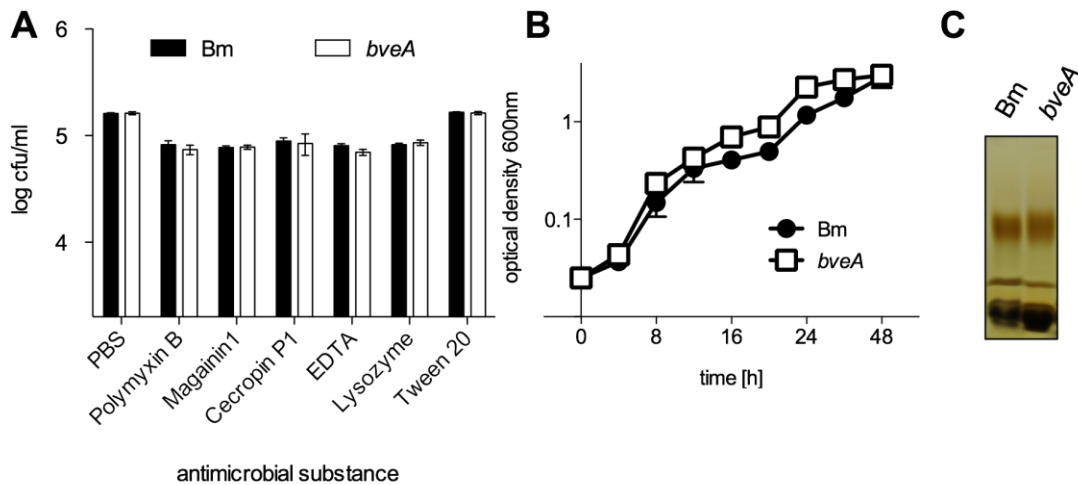

**Figure S1:** (A) Survival of  $1 \times 10^5$  wild type *B. melitensis* (Bm, black bars) and the *bveA* mutant (*bveA*, white bars) in a killing assay using various antimicrobial substances according (5) with the exception of  $25 \mu\text{g}$  of polymyxin, magainin 1 and cecropin P1 as well as 1% Tween20. (B) Growth of wild type *B. melitensis* 16M (Bm, ●) and the *bveA*-mutant (*bveA*, □) in TSB (pH=7.4) under standard growth conditions. (C) Silver-stained 18%-SDS-PAGE of LPS preparations from wild type *B. melitensis* (Bm) and the *bveA*-mutant (*bveA*) extracted according to reference 1.

Reference

1. Needham BD, Trent MS. 2013. Fortifying the barrier: the impact of lipid A remodeling on bacterial pathogenesis. *Nature Reviews Microbiology* 11:467-481.

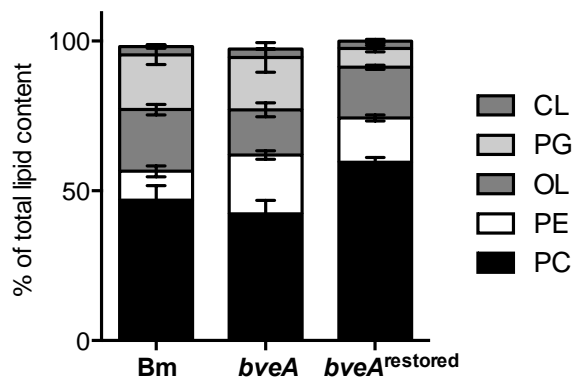

**Figure S2:** Lipid content of cell membranes from *B. melitensis* 16M wild type, a *bveA*-mutant and a wild type restoration. Relative abundance (percentage) of individual membrane lipids based on densitometry of 2D-TLC of PC, PE, OL, PG, and CL of cell envelopes of wild type *B. melitensis* (Bm), *bveA* mutant (*bveA*) and a chromosomal restoration of *bveA* (*bveA*<sup>restored</sup>)

**Table S1** BveA homologues based on Phyre 2.0 prediction

|   | pdb entry | Description based on pdb database                                      |
|---|-----------|------------------------------------------------------------------------|
| 1 | c2qjwA    | putative hydrolase <i>Xanthomonas campestris</i> pv. <i>campestris</i> |
| 2 | c2rauA    | putative lipase from <i>Sulfolobus solfataricus</i>                    |
| 3 | d1hlga    | gastric lipase                                                         |
| 4 | c2o2gA    | dienelactone hydrolase from <i>Anabaena variabilis</i><br>ATCC 29413   |

**Table S2** Comparison of p-values of Student's t-test of arcsin transformed percentages of PC, PE, OL, PG and CL in phospholipid extraction from cell envelopes of the *B. melitensis* 16M (Bm), a *bveA* mutant (*bveA*; CMR27) and the chromosomally complemented *bveA* strain TOK09 (*bveA*<sup>restored</sup>) bold values represent *p* values < 0.05.

|    | Bm versus <i>bveA</i> | <i>bveA</i> versus <i>bveA</i> <sup>restored</sup> | Bm versus <i>bveA</i> <sup>restored</sup> |
|----|-----------------------|----------------------------------------------------|-------------------------------------------|
| PC | 0.526                 | <b>0.025</b>                                       | 0.073                                     |
| PE | <b>0.018</b>          | <b>0.049</b>                                       | 0.099                                     |
| OL | 0.153                 | 0.563                                              | 0.112                                     |
| PG | 0.971                 | 0.053                                              | <b>0.016</b>                              |
| CL | 0.994                 | 0.519                                              | 0.621                                     |
